# Supplementary material for: Naproxen chemoprevention induces proliferation of cytotoxic lymphocytes in Lynch Syndrome colorectal mucosa
Source: PubMed Central journal article supplement (PMC10189148; doi:10.3389/fimmu.2023.1162669), 2023-05-03

# Supplemental Figure 1

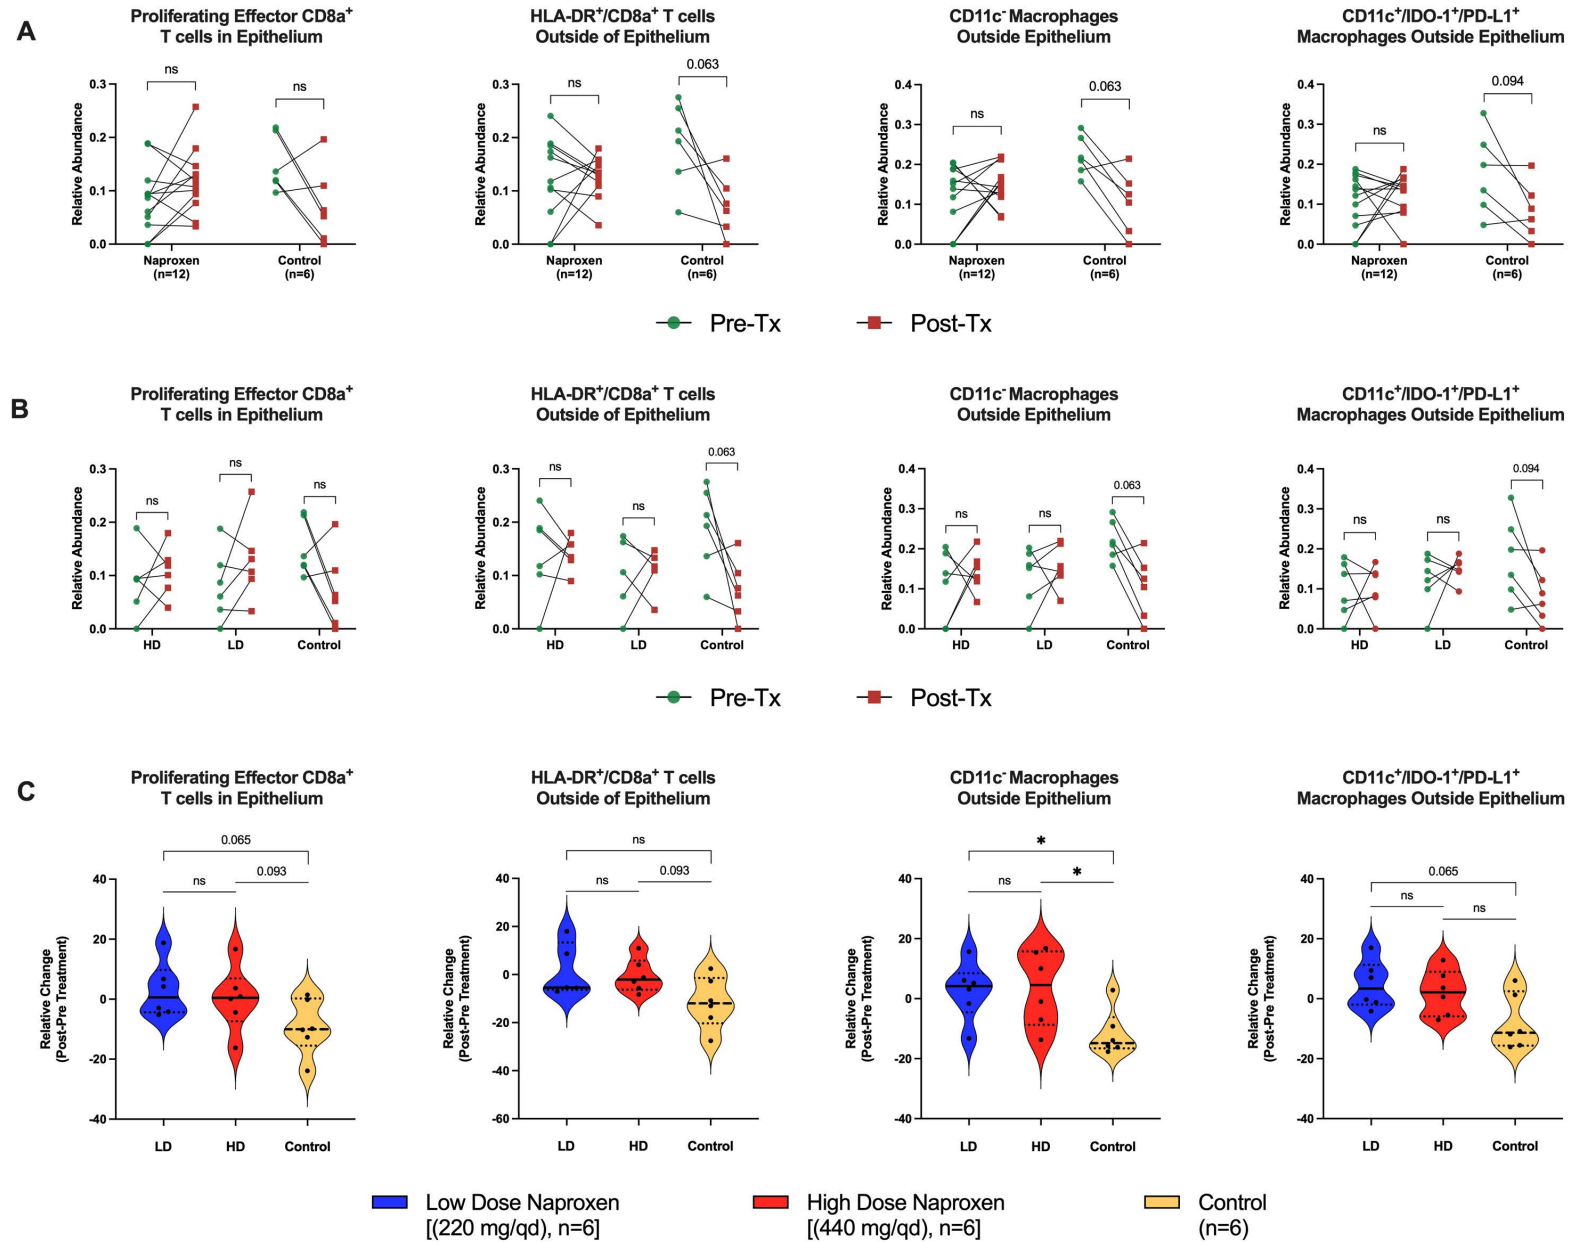

Supplemental Figure 2

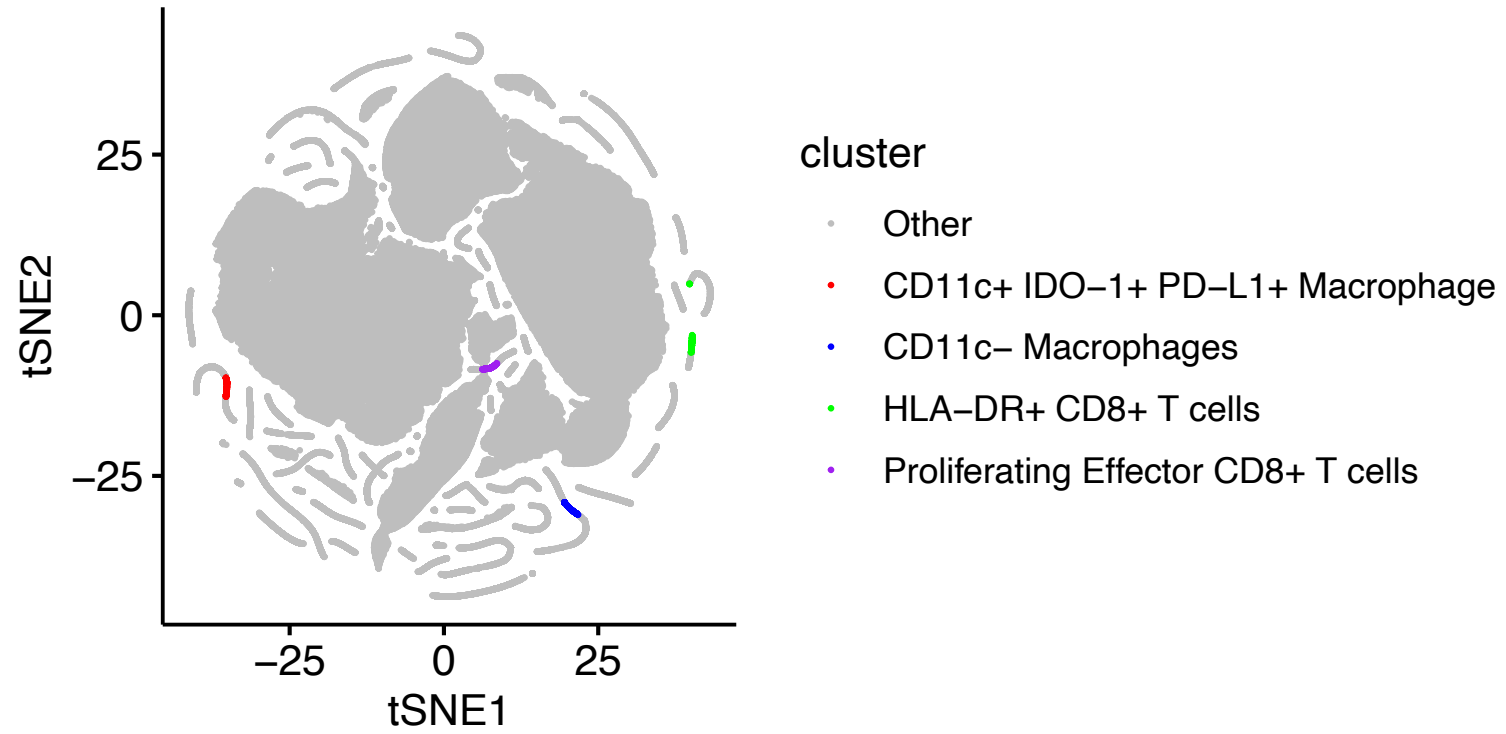

# Supplemental Figure 3

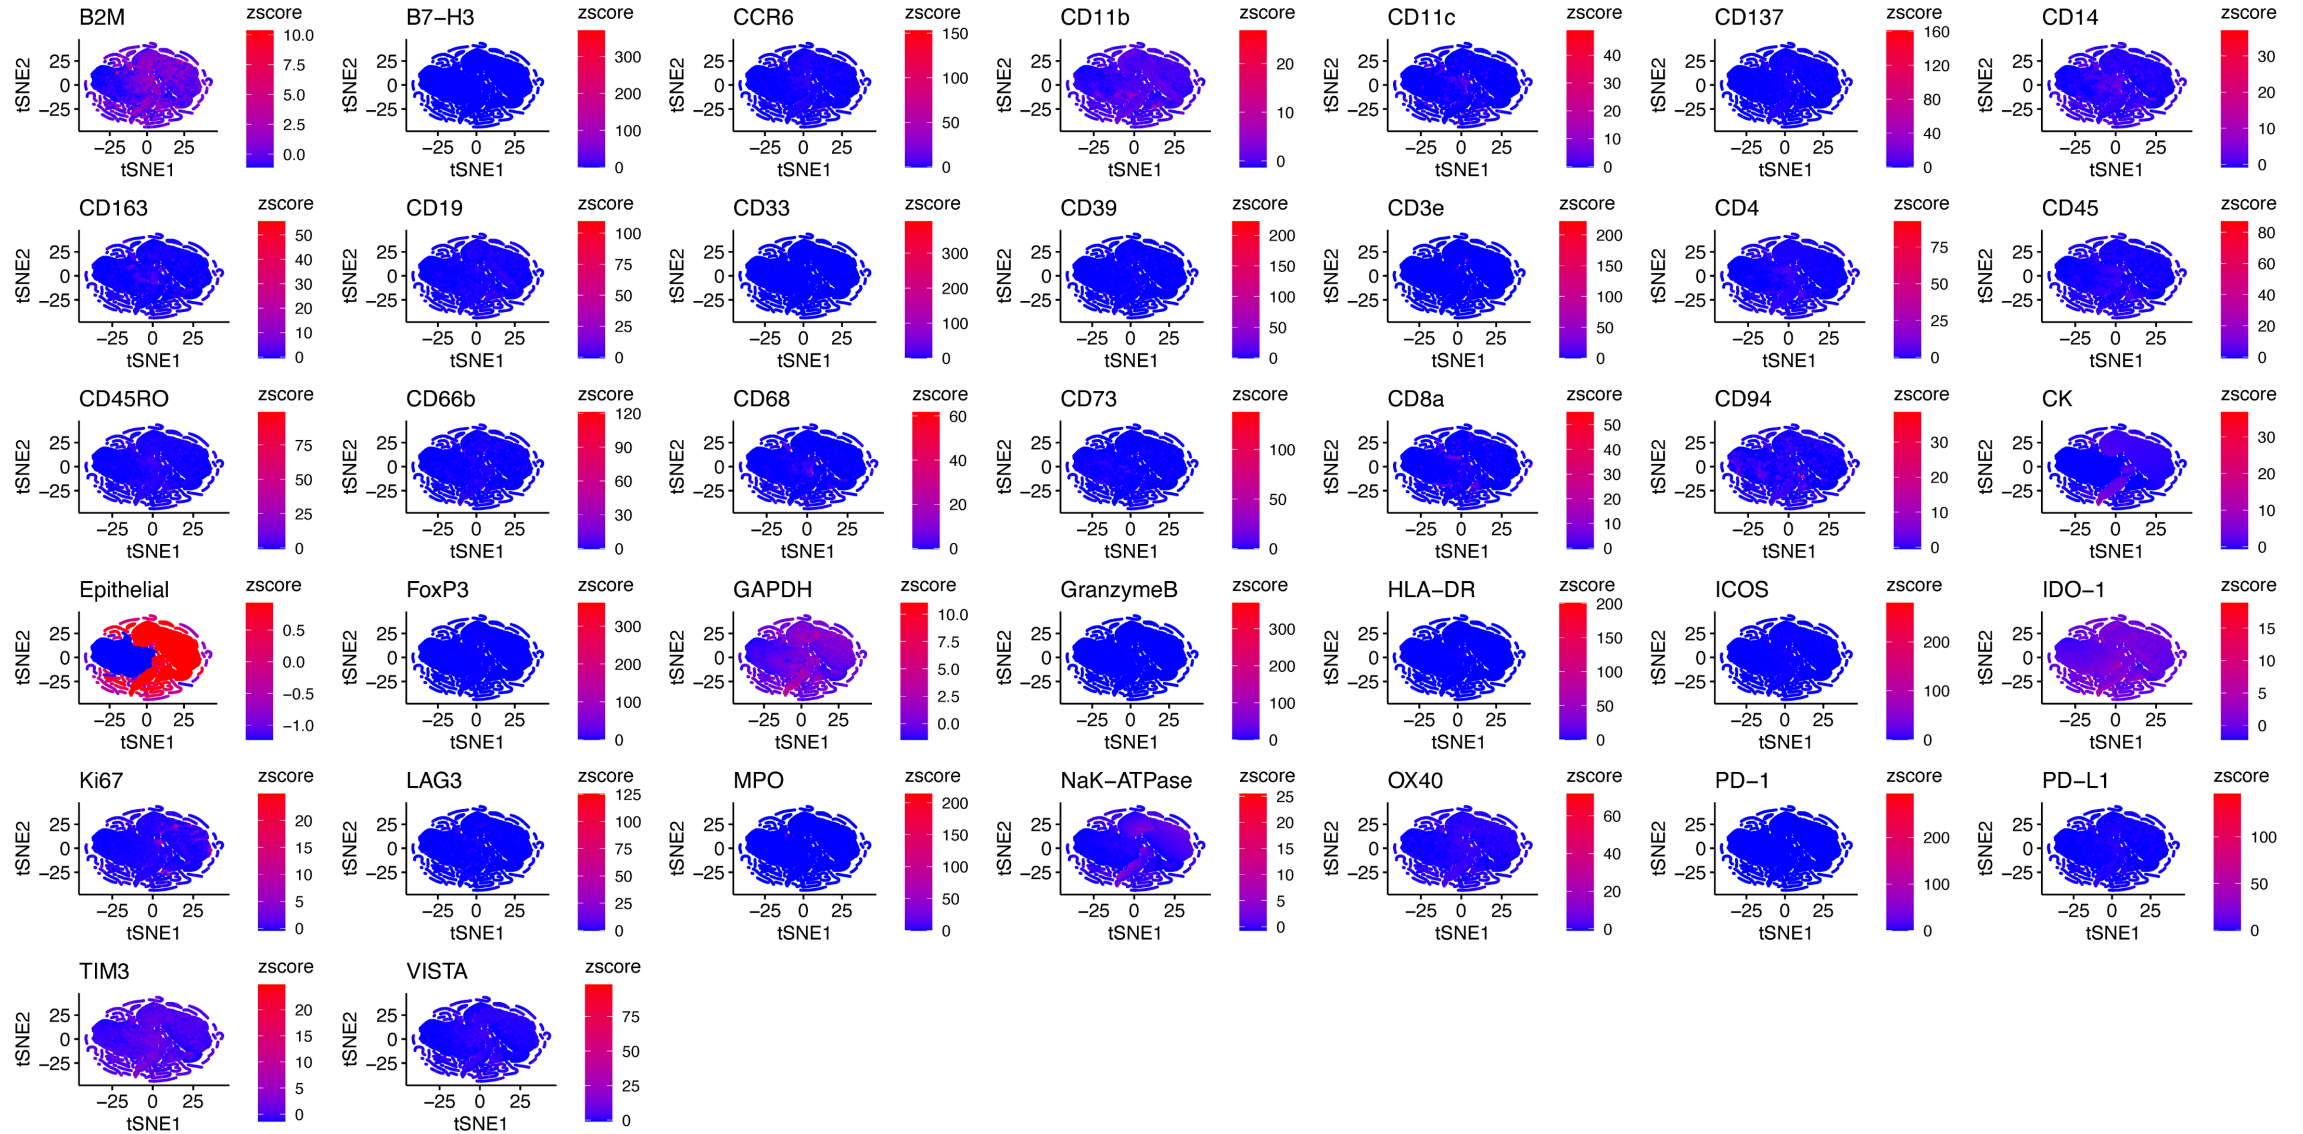

Supplement: DataSheet_1.pdf [file DataSheet_1.pdf]
